## Correction: Genomic mutation-driven metastatic breast cancer therapy: a single center experience

Yuan Yuan<sup>1</sup>, Susan E. Yost<sup>1</sup>, John Yim<sup>3</sup>, Yate-Ching Yuan<sup>2</sup>, Nicola M. Solomon<sup>1</sup>, Isa Mambetsariev<sup>1</sup>, Sumanta Pal<sup>1</sup>, Paul Frankel<sup>4</sup>, Ravi Salgia<sup>1</sup>, Susan L. Neuhausen<sup>5</sup> and Joanne Mortimer<sup>1</sup>

<sup>1</sup> Department of Medical Oncology & Molecular Therapeutics, City of Hope Comprehensive Cancer Center and Beckman Research Institute, Duarte, CA, USA

<sup>2</sup> Bioinformatics Core Facility, City of Hope Comprehensive Cancer Center and Beckman Research Institute, Duarte, CA, USA

<sup>3</sup> Department of Surgery, City of Hope Comprehensive Cancer Center and Beckman Research Institute, Duarte, CA, USA

<sup>4</sup> Department of Biostatistics, City of Hope Comprehensive Cancer Center and Beckman Research Institute, Duarte, CA, USA

<sup>5</sup> Department of Population Sciences, City of Hope Comprehensive Cancer Center and Beckman Research Institute, Duarte, CA, USA

**Published:** September 05, 2017

Copyright: Yuan et al. This is an open-access article distributed under the terms of the Creative Commons Attribution License 3.0 (CC BY 3.0), which permits unrestricted use, distribution, and reproduction in any medium, provided the original author and source are credited.

**This article has been corrected:** Dr. John Yim was added to the author list.  
The authors sincerely apologize for this oversight.

Original article: Oncotarget. 2017; 8:26414-26423. <https://doi.org/10.18632/oncotarget.14476>
